# Supplementary material for: Discovery of a New Natural Product and a Deactivation of a Quorum Sensing System by Culturing a “Producer” Bacterium With a Heat-Killed “Inducer” Culture
Source: PubMed Central journal article supplement (PMC6344404; doi:10.3389/fmicb.2018.03351), 2019-01-17
Supplement: Data_Sheet_1.pdf [file Data_Sheet_1.pdf]

## *Supplementary Material*

### **Discovery of a New Natural Product and a Deactivation of a Quorum Sensing System by Culturing a “Producer” Bacterium with a Heat-Killed “Inducer” Culture**

Libang Liang<sup>1</sup>, Amanda Sproule<sup>1</sup>, Brad Haltli<sup>1,2,3</sup>, Douglas H. Marchbank<sup>1,3</sup>, Fabrice Berrué<sup>1</sup>, David P. Overy<sup>1,4</sup>, Kate McQuillan<sup>3</sup>, Martin Lanteigne<sup>1</sup>, Noelle Duncan<sup>3</sup>, Hebelin Correa<sup>3</sup> and Russell G. Kerr<sup>1,2,3\*</sup>

<sup>1</sup> Department of Chemistry, University of Prince Edward Island, Charlottetown, PE, Canada,

<sup>2</sup> Department of Biomedical Sciences, Atlantic Veterinary College, University of Prince Edward Island, Charlottetown, PE, Canada,

<sup>3</sup> Nautilus Biosciences Croda, Charlottetown, PE, Canada,

<sup>4</sup> Department of Pathology and Microbiology, Atlantic Veterinary College, University of Prince Edward Island, Charlottetown, PE, Canada

**\*Correspondence:** Russell G. Kerr: [rkerr@upei.ca](mailto:rkerr@upei.ca)

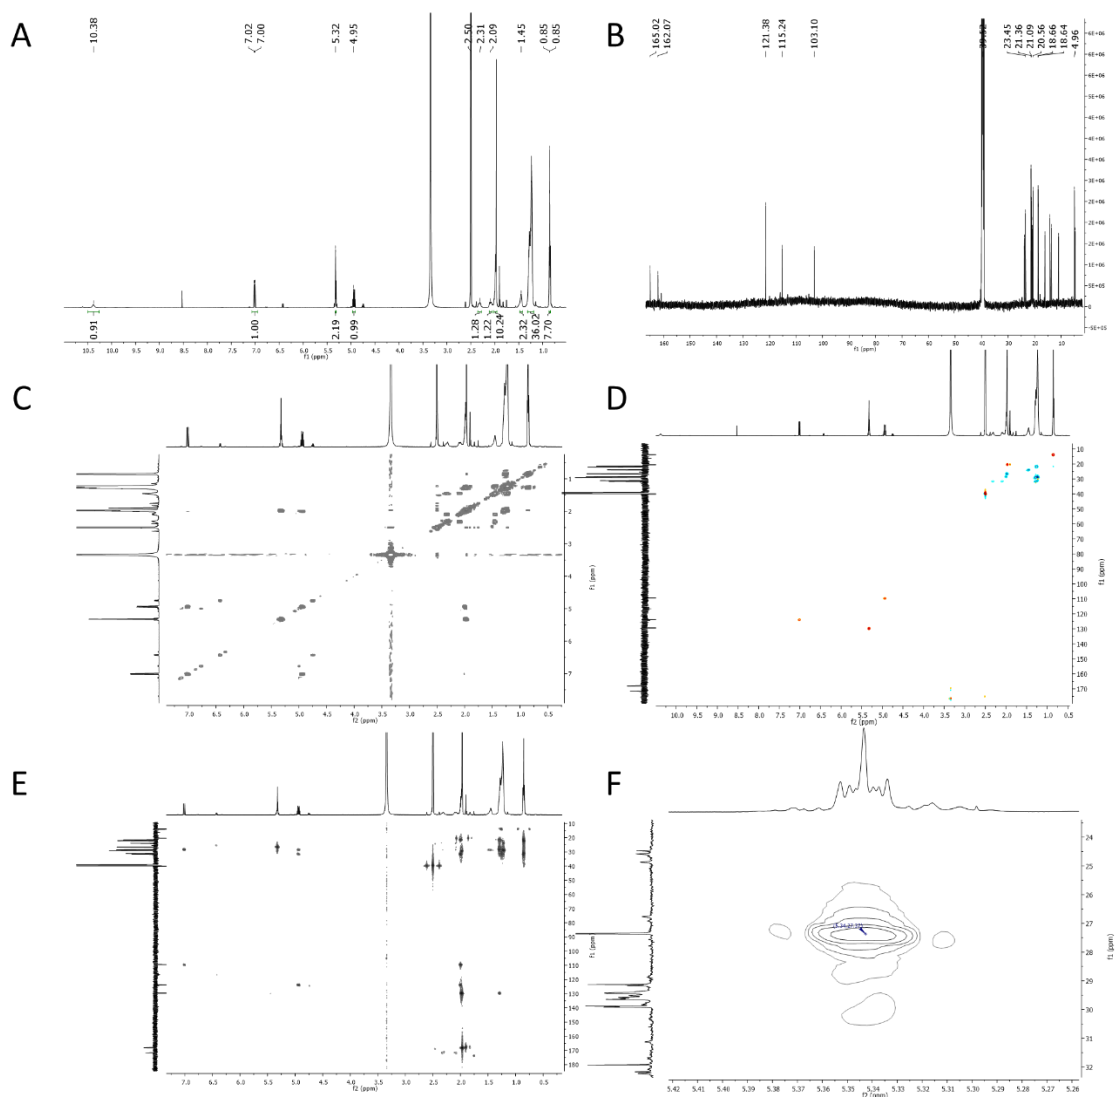

**Supplementary Figure S1 | 1D and 2D ( $^1\text{H}$  600 MHz,  $^{13}\text{C}$  150 MHz) NMR spectra of hydrazidomycin D in  $\text{DMSO-}d_6$  and  $\text{CDCl}_3$ .**

(A)-(E) are  $^1\text{H}$ ,  $^{13}\text{C}$ , COSY,  $^1\text{H-}^{13}\text{C}$  HSQC (red cross-peaks are negatively phased, blue cross-peaks are positively phased),  $^1\text{H-}^{13}\text{C}$  HMBC (coupling constant 5 Hz) NMR spectra in  $\text{DMSO-}d_6$ , respectively. (F) is  $^1\text{H-}^{13}\text{C}$  HMBC NMR spectrum (coupling constant 5 Hz) in  $\text{CDCl}_3$ . The  $\alpha$ -carbons to the double bond in the C18 alkyl chain had chemical shifts of 27.37 ppm, suggesting a *cis*-configuration of the double bond.  $\text{CDCl}_3$  was chosen as a solvent for direct chemical shift comparison with data reported by (van Boom et al., 1977).

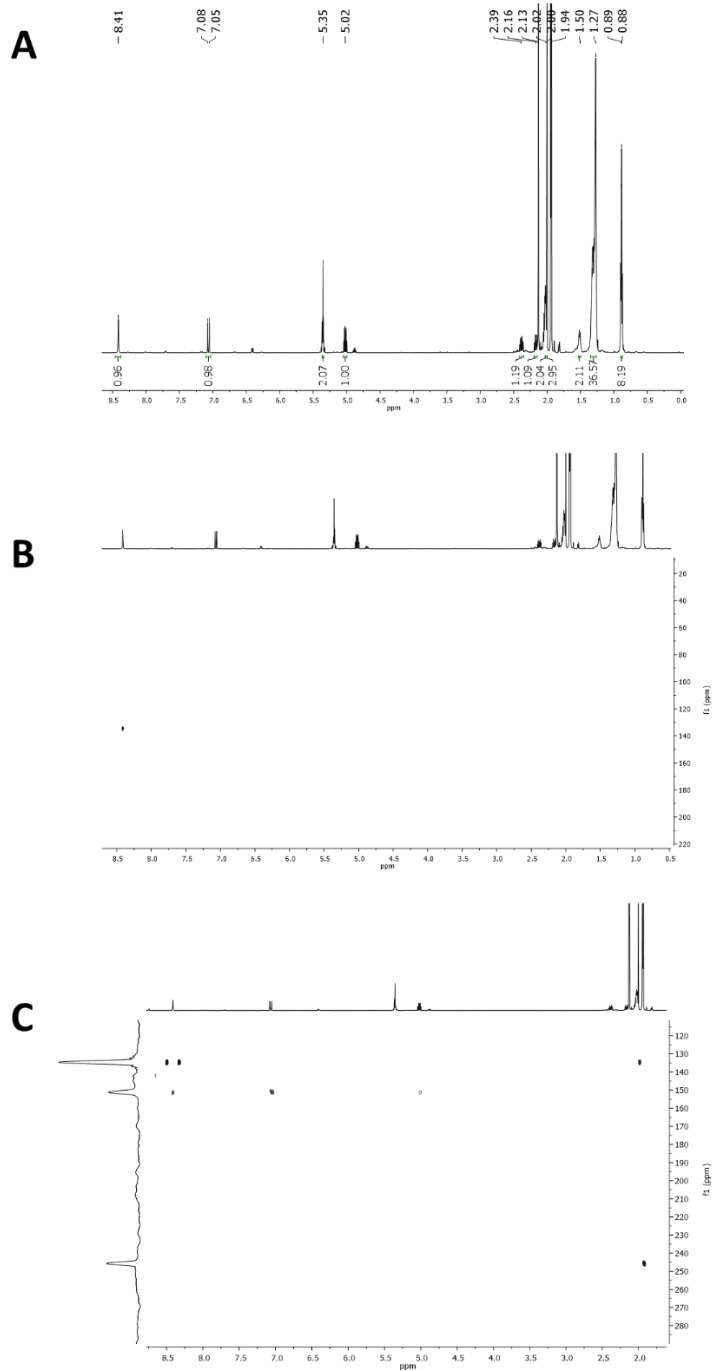

**Supplementary Figure S2 | 1D and 2D ( $^1\text{H}$  600 MHz,  $^{15}\text{N}$  60 MHz) NMR spectra of hydrazidomycin D in  $\text{CD}_3\text{CN}$ .**

(A)-(C) are  $^1\text{H}$ ,  $^1\text{H}$ - $^{15}\text{N}$  HSQC (coupling constant 90 Hz),  $^1\text{H}$ - $^{15}\text{N}$  HMBC (coupling constant 8 Hz) NMR spectra in  $\text{CD}_3\text{CN}$ , respectively.

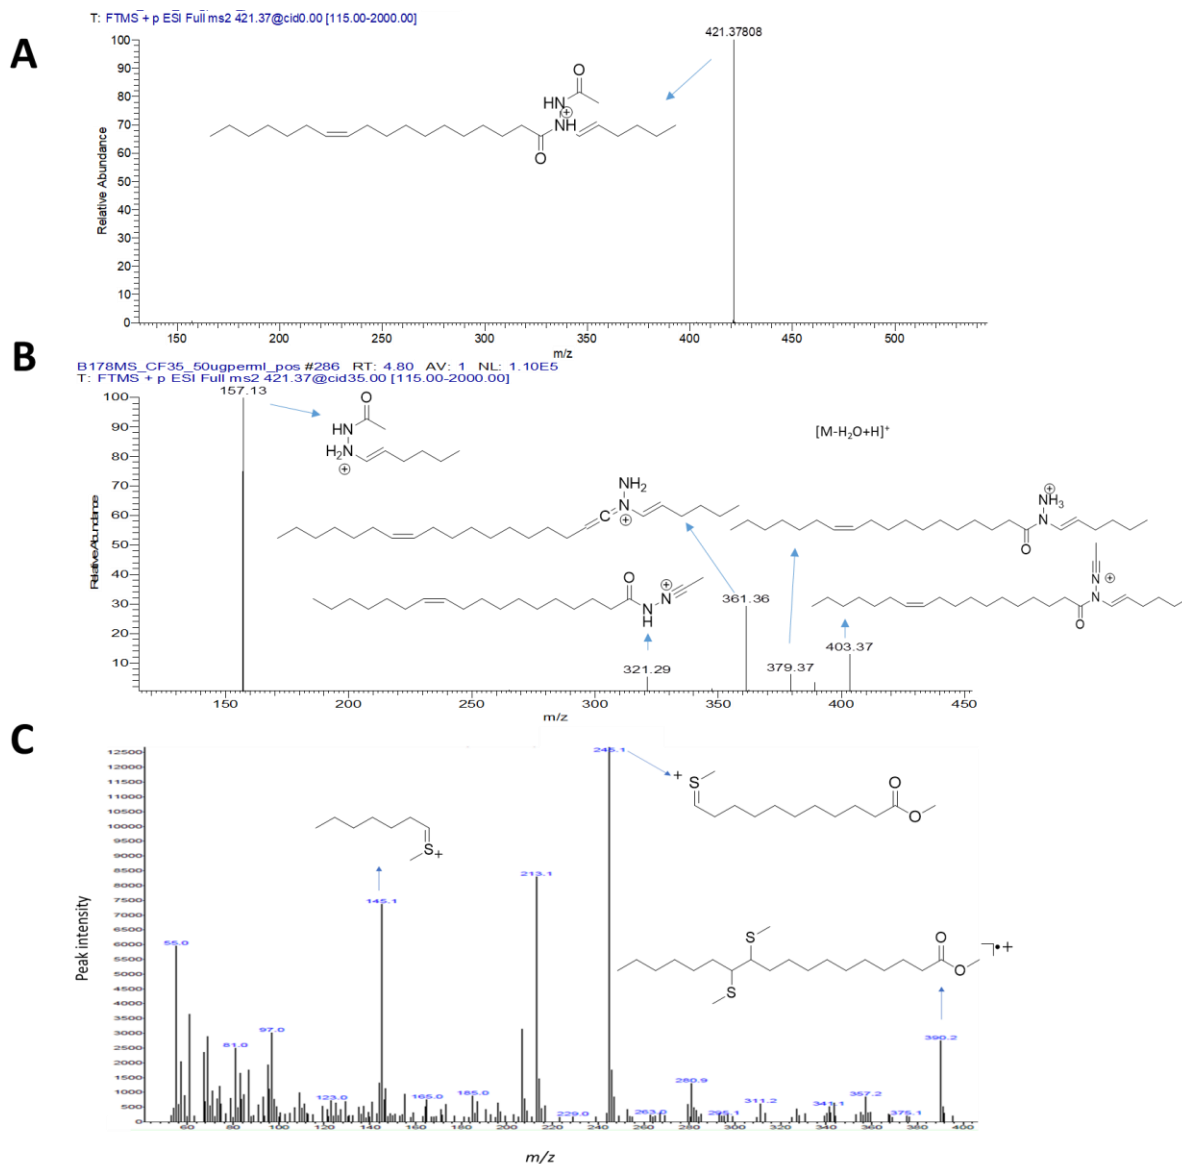

**Supplementary Figure S3 | Mass spectrometry characterization of hydrazidomycin D.**

(A) High-resolution mass spectrum (MS<sup>1</sup>) in ESI positive mode of hydrazidomycin D showing the parent  $m/z$  421.3781 [M + H]<sup>+</sup> adduct. (B) MS/MS spectrum (35 eV) in ESI positive mode of hydrazidomycin D with proposed fragment structures. (C) GC-EIMS spectrum of the DMDS derivatized product confirming the double bond is located between C11 and C12.

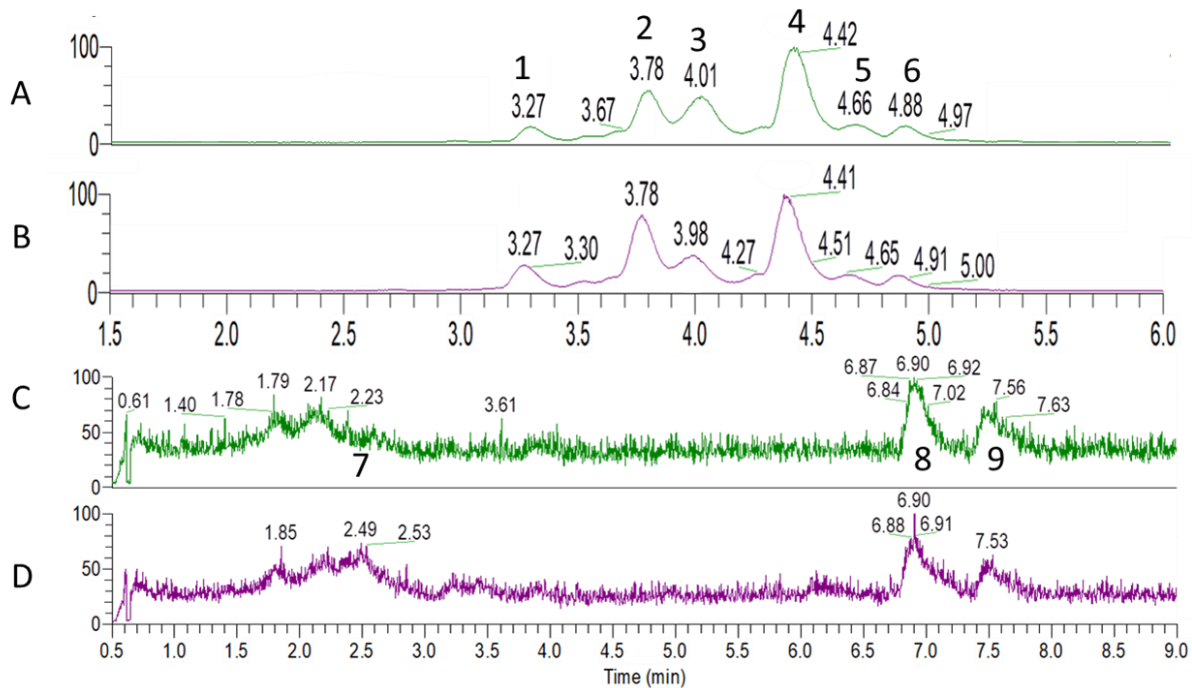

**Supplementary Figure S4 | Comparison of UHPLC-HRESIMS profiles *P. aeruginosa* (ISP2, 30°C, 200 rpm, 48 h) and *M. smegmatis* liquid cultures (ISP2, 30°C, 200 rpm, 144 h) before and after autoclaving.**

Chromatograms (A), (B), (C), and (D) are autoclaved *P. aeruginosa*, non-autoclaved *P. aeruginosa*, autoclaved *M. smegmatis*, and non-autoclaved *M. smegmatis* cultures, respectively. The maximum peak intensity of chromatograms (A) – (D) are 7.5E6, 5.8E6, 3.7E5, and 4.6E5, respectively.

In (A) and (B), peak 1 is HHQ ( $m/z$  244.1696 [M + H]<sup>+</sup>, calcd 244.1696); peak 2 is a putative HHQ analogue with a mass difference of two methylene groups ( $m/z$  272.2006 [M + H]<sup>+</sup>, calcd 272.2009; peak 3 is Rha-Rha-C10-C10 ( $m/z$  673.3778 [M + Na]<sup>+</sup>, calcd 673.3770); and peak 4 is Rha-C10-C10 ( $m/z$  527.3192 [M + Na]<sup>+</sup>, calcd 527.3191); peaks 5 and 6 are putative Rha-C10-C10 analogues ( $m/z$  553.3360 [M + Na]<sup>+</sup>, calcd 553.3347 and  $m/z$  555.3515 [M + Na]<sup>+</sup>, calcd 555.3504).

In (C) and (D), peaks between 1.5 min to 3 min are mainly media components from ISP2, except peak 7 is a *M. smegmatis* metabolite ( $m/z$  247.10780 [M + H]<sup>+</sup>); peak 8 is the added 10 µg/mL internal standard dioctyl phthalate ( $m/z$  391.28427 [M + H]<sup>+</sup>, calcd 391.28429); peak 9 is a *M. smegmatis* metabolite ( $m/z$  338.34161 [M + H]<sup>+</sup>).

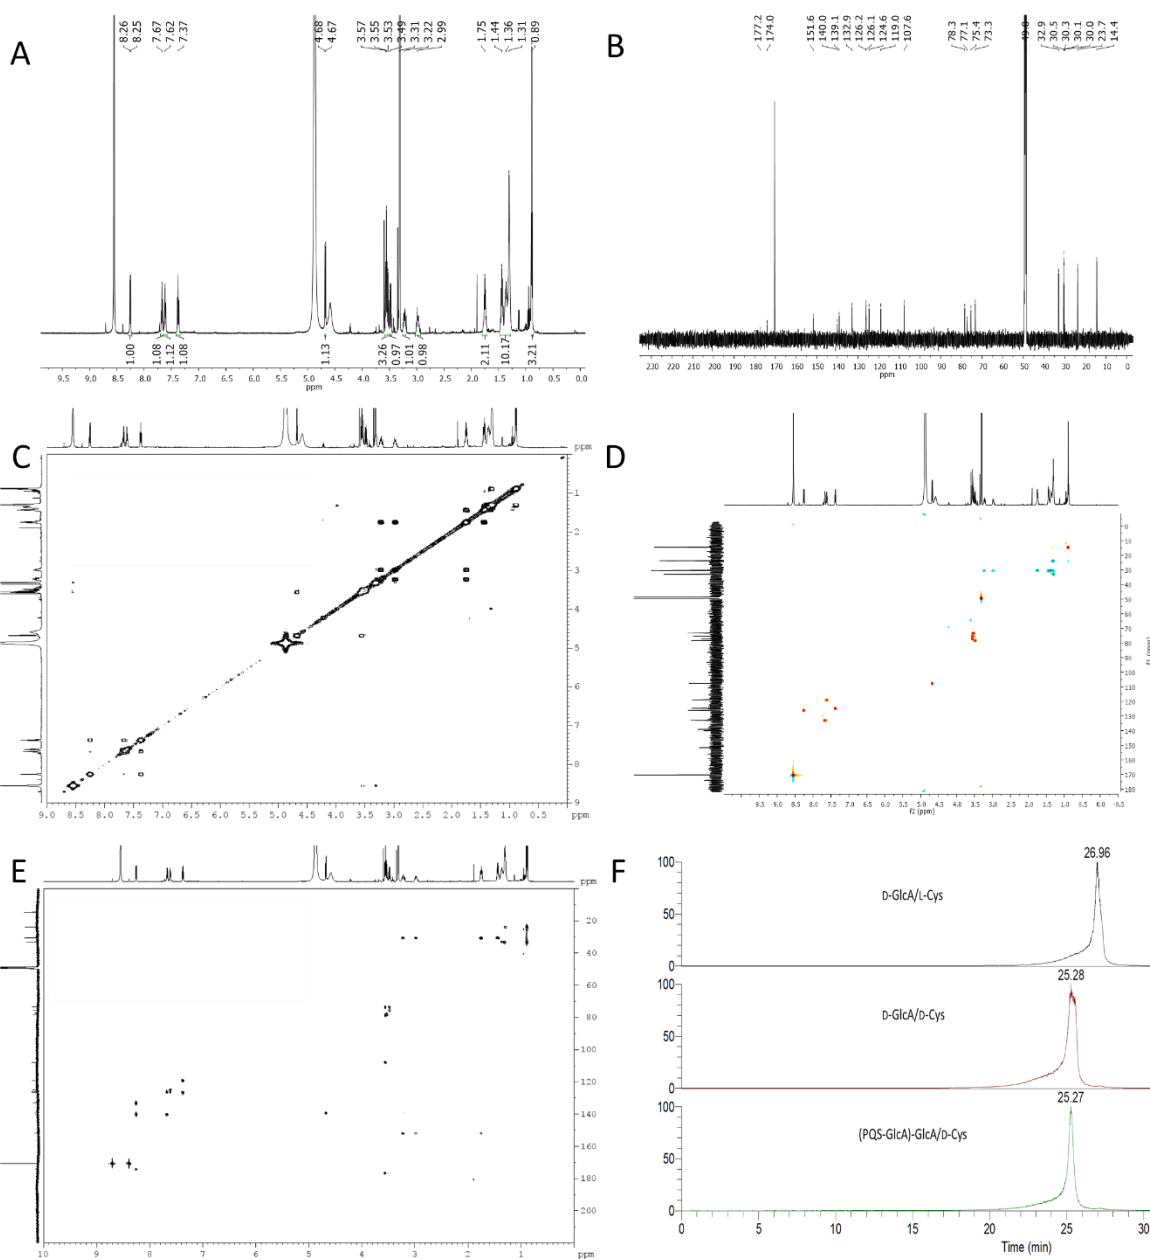

**Supplementary Figure S5 | 1D and 2D ( $^1\text{H}$  600 MHz,  $^{13}\text{C}$  150 MHz) NMR spectra of PQS-GlcA in  $\text{CD}_3\text{OD}$  and chromatographic characterization of stereochemistry of the glucuronic acid moiety.**

(A)-(E) are  $^1\text{H}$ ,  $^{13}\text{C}$ , COSY,  $^1\text{H}$ - $^{13}\text{C}$  HSQC (red cross-peaks are negatively phased, blue cross-peaks are positively phased),  $^1\text{H}$ - $^{13}\text{C}$  HMQC (coupling constant 5 Hz) NMR spectra in  $\text{CD}_3\text{OD}$ , respectively. (F) is UHPLC-HRESIMS chromatograms on D-GlcA/L-cysteine methyl ester, D-GlcA/D-cysteine methyl ester and PQS-GlcA/D-cysteine methyl ester, respectively. Retention time measurement L-GlcA/D-Cys was by its enantiomer D-GlcA/L-Cys. This result suggests the glucuronic acid moiety in PQS-GlcA have a D-configuration.

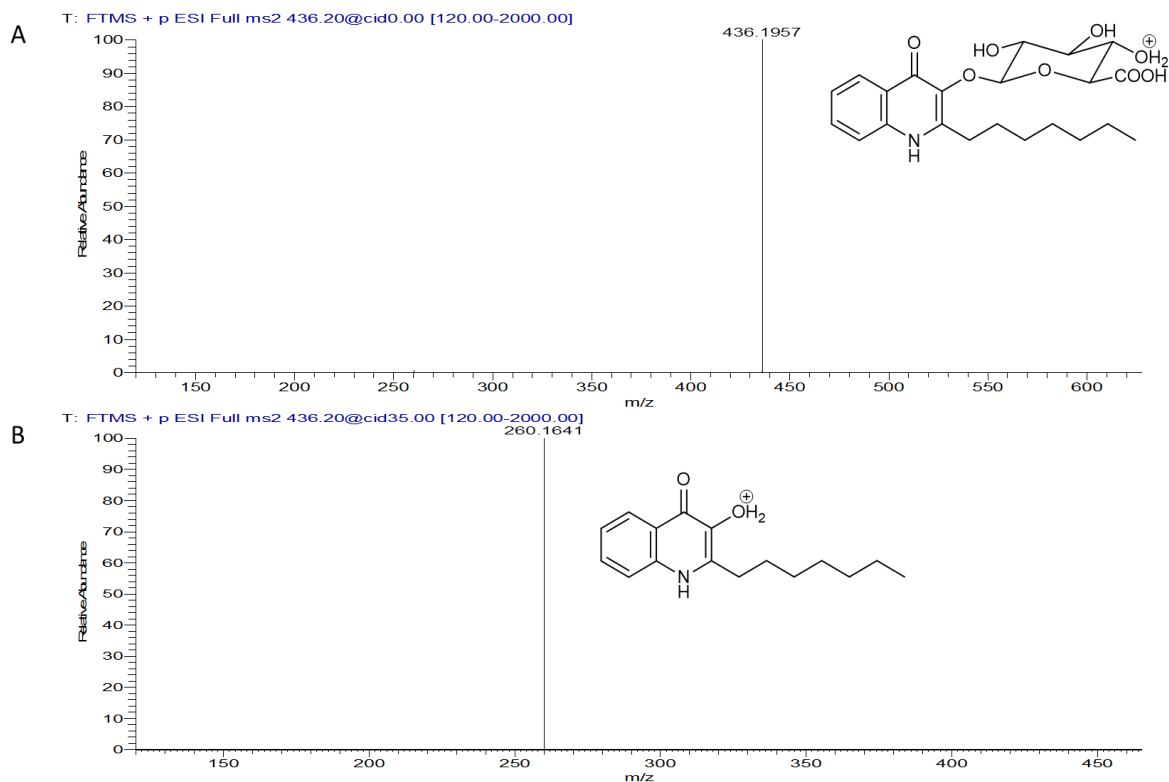

**Supplementary Figure S6 | ESI tandem mass spectrometry in positive mode of PQS-GlcA.**

(A) High-resolution mass spectrum ( $MS^1$ ) of PQS-GlcA showing the parent  $m/z$  436.1957  $[M + H]^+$  adduct. (B)  $MS/MS$  spectrum (35 eV) of PQS-GlcA with fragment ion  $m/z$  260.1641  $[M + H]^+$  that is consistent with the PQS aglycone portion of PQS-GlcA.

**Supplementary Table S1 | Possible identities of the mass features of interest based on a search of AntiBase 2017.** These compounds were selected based on induction, up-regulation and/or production level in culture screening.

| Mass feature (m/z_RT) | Adduct              | Metabolomics | Producer | Inducer                | Database match (<5 ppm)                    | Δppm  | Source Organism                                   | Reference                 |
|-----------------------|---------------------|--------------|----------|------------------------|--------------------------------------------|-------|---------------------------------------------------|---------------------------|
| 368.1493_4.19         |                     | U            | VI       | AF_A                   |                                            |       |                                                   |                           |
| 382.165_4.41          |                     | U            | VI       | AF_A                   |                                            |       |                                                   |                           |
| 258.1125_2.66         | [M+H] <sup>+</sup>  | U            | VI       | AF_A                   | carbazomycin G                             | 0.071 | <i>Streptoverticillium ehimense</i>               | (Kaneda et al., 1988)     |
| 416.1493_4.35         | [M+Na] <sup>+</sup> | U            | VI       | AF_A                   | latrunculin T                              | 2.198 | Sponge                                            | (El Sayed et al., 2006)   |
| 421.3781_5.79         |                     | U            | VI       | MS_A,<br>MS_B,<br>PA_B |                                            |       |                                                   |                           |
| 313.2848_4.62         |                     | I            | VI       | MS_A,<br>MS_B,<br>PA_B |                                            |       |                                                   |                           |
| 271.0602_3.59         | [M+H] <sup>+</sup>  | U            | VI       | PA_B                   | 3,8-dihydroxy-1-methoxy-9,10-anthraquinone | 0.369 | <i>Xenorhabdus luminescens</i>                    | (Richardson et al., 1988) |
| 221.1262_2.46         | [M+Na] <sup>+</sup> | U            | VI       | PA_B                   | Maniwamycin A                              | 1.80  | <i>Streptomyces prasinopilosus</i>                | (Takahashi et al., 1989)  |
| 467.2079_2.81         | [M+H] <sup>+</sup>  | U            | VI       | BS_A                   | Staurosporine                              | 0.284 | <i>Streptomyces griseolus</i>                     | (Funato et al., 1994)     |
| 455.1604_4.15         |                     | I            | VI       | AF_A                   |                                            |       |                                                   |                           |
| 441.1447_4.06         |                     | I            | VI       | AF_A                   |                                            |       |                                                   |                           |
| 240.102_2.66          | [M+H] <sup>+</sup>  | I            | VI       | AF_A                   | Aspergilitine                              | 0.395 | <i>Aspergillus versicolor</i>                     | (Lin et al., 2003)        |
| 314.1023_1.64         |                     | I            | VI       | AF_A                   |                                            |       |                                                   |                           |
| 240.1022_3.08         | [M+H] <sup>+</sup>  | I            | VI       | AF_A,<br>MS_A          | Aspergilitine                              | 0.395 | <i>Aspergillus versicolor</i>                     | (Lin et al., 2003)        |
| 432.1443_3.77         |                     | U            | VI       | AF_A                   |                                            |       |                                                   |                           |
| 588.3439_1.93         |                     | U            | VI       | AF_A,<br>PA_B          |                                            |       |                                                   |                           |
| 436.1966_2.75         |                     | I            | VI       | PA_B                   |                                            |       |                                                   |                           |
| 435.3947_6.00         |                     | I            | VI       | MS_A                   |                                            |       |                                                   |                           |
| 789.7225_5.72         |                     | I            | VI       | MS_A                   |                                            |       |                                                   |                           |
| 254.0811_2.05         | [M+H] <sup>+</sup>  | I            | VI       | BS_A,<br>MS_A          | utahmycin A                                | 0.274 | <i>Streptomyces albus</i> J1704 + metagenomic DNA | (Bauer et al., 2010)      |
| 263.1767_3.22         |                     | U            | VI       | BS_B                   |                                            |       |                                                   |                           |
| 404.3161_5.30         |                     | I            | III      | AF_A,<br>BS_B,<br>MS_A |                                            |       |                                                   |                           |
| 224.0919_1.71         | [M+H] <sup>+</sup>  | I            | III      | AF_A                   | Christolane C                              | 0.739 | <i>Streptomyces lydicus</i> NRRL 2433 mutants     | (Gómez et al., 2012)      |
| 275.0551_2.70         | [M+H] <sup>+</sup>  | U            | VII      | MS_A,<br>MS_B          | Juglomycin A/B                             | 0.311 | <i>Streptomyces diastatochromogenes</i>           | (牛山敬一 et al., 1971)       |
| 389.2324_4.75         |                     | I            | I        | BS_B,<br>MS_A,<br>MS_B |                                            |       |                                                   |                           |
| 1087.4727_4.21        | [M+H] <sup>+</sup>  | U            | V        | BS_B,<br>MS_A,<br>MS_B | Landomycin A                               | 1.838 | <i>Streptomyces</i> sp.                           | (Henkel et al., 1990)     |
| 1109.4521_4.20        |                     | U            | V        | BS_B,<br>MS_A,<br>MS_B |                                            |       |                                                   |                           |
| 1104.4989_4.21        |                     | U            | V        | BS_B,<br>MS_A,<br>MS_B |                                            |       |                                                   |                           |

U: up-regulated; I: induced.



**Supplementary Table S2 |  $^1\text{H}$  (600 MHz) and  $^{13}\text{C}$  (150 MHz) NMR data for hydrazidomycin D recorded in  $\text{DMSO-}d_6$ .**

| Position                         | $\delta_{\text{C}}/\delta_{\text{N}}$ , type | $\delta_{\text{H}}$ , (J in Hz)            | COSY   | HMBC (H $\rightarrow$ C)          |
|----------------------------------|----------------------------------------------|--------------------------------------------|--------|-----------------------------------|
| 1                                | 171.6, C                                     | -                                          | -      | -                                 |
| 2                                | 31.6, CH <sub>2</sub>                        | 2.31, 2.09, m                              | 3      | C-1, 3                            |
| 3                                | 23.9, CH <sub>2</sub>                        | 1.45, m                                    | 2, 4   | C-1 <sup>a</sup> , 2 <sup>a</sup> |
| 4                                | 28.3~29.0 <sup>b</sup> , CH <sub>2</sub>     | 1.20, m                                    | 3      | -                                 |
| 5                                | 28.3~29.0 <sup>b</sup> , CH <sub>2</sub>     | 1.21~1.29 <sup>b</sup> , m                 | -      | -                                 |
| 6                                | 28.3~29.0 <sup>b</sup> , CH <sub>2</sub>     | 1.21~1.29 <sup>b</sup> , m                 | -      | -                                 |
| 7                                | 28.3~29.0 <sup>b</sup> , CH <sub>2</sub>     | 1.21~1.29 <sup>b</sup> , m                 | -      | -                                 |
| 8                                | 28.3~29.0 <sup>b</sup> , CH <sub>2</sub>     | 1.26, m                                    | 9      | -                                 |
| 9                                | 29.1, CH <sub>2</sub>                        | 1.29, m                                    | 8, 10  | -                                 |
| 10                               | 26.6, CH <sub>2</sub>                        | 1.97, m                                    | 9, 11  | 9, 12                             |
| 11                               | 129.7, CH                                    | 5.32, dt (9.6, 5.1)                        | 10, 12 | 9, 13                             |
| 12                               | 129.7, CH                                    | 5.32, dt (9.6, 5.1)                        | 11, 13 | 10, 14                            |
| 13                               | 26.6, CH <sub>2</sub>                        | 1.97, m                                    | 12, 14 | 11, 14                            |
| 14                               | 29.1, CH <sub>2</sub>                        | 1.29, m                                    | 13, 15 | -                                 |
| 15                               | 28.3~29.0 <sup>b</sup> , CH <sub>2</sub>     | 1.26, m                                    | 14     | -                                 |
| 16                               | 31.1, CH <sub>2</sub>                        | 1.24, m                                    | -      | -                                 |
| 17                               | 21.5, CH <sub>2</sub>                        | 1.26, m                                    | 18     | -                                 |
| 18                               | 13.8, CH <sub>3</sub>                        | 0.85, t (7.0)                              | 17     | C-16, 17                          |
| 19                               | 123.9, CH                                    | 7.01, d (14.1)                             | 20     | C-20, 21, N-A, N-B                |
| 20                               | 109.6, CH                                    | 4.94, dt (14.1, 7.1)                       | 19, 21 | C-19, 21, 22, N-B                 |
| 21                               | 28.6, CH <sub>2</sub>                        | 1.99, m                                    | 20, 22 | C-19, 20, 22, 23                  |
| 22                               | 31.6, CH <sub>2</sub>                        | 1.28, m                                    | 22     | -                                 |
| 23                               | 21.5, CH <sub>2</sub>                        | 1.26, m                                    | 24     | -                                 |
| 24                               | 13.9, CH <sub>3</sub>                        | 0.85, t (7.1)                              | 23     | C-22, 23                          |
| 25                               | 168.1, C                                     | -                                          | -      | -                                 |
| 26                               | 20.4, CH <sub>3</sub>                        | 1.97, s                                    | -      | C-25, N-A                         |
| N <sup><math>\alpha</math></sup> | 134.6 <sup>c</sup> , NH                      | 10.38, s (broad),<br>8.41 <sup>c</sup> , s | -      | N-B <sup>c</sup> , C-25           |
| N <sup><math>\beta</math></sup>  | 151.2 <sup>c</sup> , N                       | -                                          | -      | -                                 |

a. correlations observed in  $\text{CD}_3\text{OD}$ . b. signals are not distinguishable. c. chemical shifts and correlations measured in  $\text{CD}_3\text{CN}$ .

**Supplementary Table S3 |  $^1\text{H}$  (600 MHz) and  $^{13}\text{C}$  (150 MHz) NMR data for PQS-GlcA recorded in  $\text{CD}_3\text{OD}$ .**

| Position | $\delta_{\text{C}}$ , type | $\delta_{\text{H}}$ , ( $J$ in Hz) | COSY       | HMBC (H $\rightarrow$ C) |
|----------|----------------------------|------------------------------------|------------|--------------------------|
| 1        | -                          | 12.32*, s (broad)                  | -          | -                        |
| 2        | 151.6, C                   | -                                  | -          | -                        |
| 3        | 139.1, C                   | -                                  | -          | -                        |
| 4        | 174.0, C                   | -                                  | -          | -                        |
| 5        | 126.1, C                   | -                                  | -          | -                        |
| 6        | 126.2, CH                  | 8.27, d (8.1)                      | 7          | 4, 8, 10                 |
| 7        | 124.6, CH                  | 7.37, dd (7.5, 8.1)                | 6, 7       | 5, 9                     |
| 8        | 132.9, CH                  | 7.67, dd (7.5, 8.5)                | 7, 9       | 6, 10                    |
| 9        | 119.0, CH                  | 7.62, d (8.5)                      | 8          | 5, 7                     |
| 10       | 140.0, C                   | -                                  | -          | -                        |
| 11       | 30.5, $\text{CH}_2$        | 3.22, m; 2.99, m                   | 11, 12     | 2, 3, 12                 |
| 12       | 30.0, $\text{CH}_2$        | 1.75, quint (7.7)                  | 11, 13     | 11, 13                   |
| 13       | 30.1, $\text{CH}_2$        | 1.44, m; 1.36, m                   | 12, 13, 14 | 12, 14                   |
| 14       | 30.3, $\text{CH}_2$        | 1.31, m                            | 13         | 13, 15                   |
| 15       | 32.9, $\text{CH}_2$        | 1.30, m                            | -          | 14, 16                   |
| 16       | 23.7, $\text{CH}_2$        | 1.32, m                            | 17         | 15, 17                   |
| 17       | 14.4, $\text{CH}_3$        | 0.89, t (6.8)                      | 16         | 15, 16                   |
| 1'       | 107.6, CH                  | 4.68, d (7.8)                      | 2'         | 3                        |
| 2'       | 75.4, CH                   | 3.55, dd (7.8, 8.7)                | 1', 3'     | -                        |
| 3'       | 78.3, CH                   | 3.49, dd (8.7, 8.7)                | 2', 4'     | -                        |
| 4'       | 73.3, CH                   | 3.53, dd (8.7, 9.5)                | 3', 5'     | -                        |
| 5'       | 77.1, CH                   | 3.57, d (9.5)                      | 4'         | 6'                       |
| 6'       | 177.2, C                   | -                                  | -          | -                        |

\*Measured in  $\text{DMSO-}d_6$

**Supplementary Table S4 | Identities of 14 environmental actinomycete strains tested for secondary metabolite induction in response to HHQ exposure.**

GenBank accession numbers are provided for 16S rRNA gene sequences of the strains used in this study. The % ID value is that of the highest scoring match in a BlastN search of the 16S rRNA sequence database.

| <b>Strain</b> | <b>GenBank Accession No.</b> | <b>Closest BlastN Hit (Accession No.)</b>        | <b>% ID</b> |
|---------------|------------------------------|--------------------------------------------------|-------------|
| RKBH-B092     | KY362380                     | <i>Streptomyces tateyamensis</i> (NR_112842)     | 99.80       |
| RKBH-B124     | KY362382                     | <i>Streptomyces rochei</i> (NR_116078)           | 100.00      |
| RKBH-B476     | KY362385                     | <i>Streptomyces gelaticus</i> (NR_043488)        | 98.05       |
| RKBH-B477     | KY362386                     | <i>Streptomyces galilaeus</i> (NR_040857)        | 98.86       |
| RKHS-054      | KY362387                     | <i>Streptomyces bellus</i> (NR_041222)           | 97.51       |
| RKHS-126      | KY362388                     | <i>Streptomyces bikiniensis</i> (NR_026177)      | 99.27       |
| RKHS-142      | KY362389                     | <i>Promicromonospora iranensis</i> (NR_109446.1) | 98.92       |
| RKHS-146      | KY364190                     | <i>Streptomyces ederensis</i> (NR_112457)        | 99.06       |
| RKLL-001      | KY362390                     | <i>Streptomyces fulvissimus</i> (NR_103947)      | 99.87       |
| RKND-081      | KY362391                     | <i>Streptomyces badius</i> (NR_043350)           | 99.53       |
| RKND-187      | KY362392                     | <i>Streptomyces drozdowiczii</i> (NR_116093)     | 99.46       |
| RKND-216      | KY362393                     | <i>Streptomyces qinglanensis</i> (NR_109303)     | 98.92       |
| RKND-444      | KY362394                     | <i>Streptomyces zaomyceticus</i> (NR_044144)     | 99.93       |
| RKNM-081      | KY362396                     | <i>Streptomyces canus</i> (NR_043347)            | 98.93       |

## Supplementary Table S5 | Biological activities of some nitrogen-nitrogen bond containing natural products.

| natural products | biological activities                                                                                                                                                                                                                                                                         | source                                       | references                            |
|------------------|-----------------------------------------------------------------------------------------------------------------------------------------------------------------------------------------------------------------------------------------------------------------------------------------------|----------------------------------------------|---------------------------------------|
| Hydrazidomycin A | IC <sub>50</sub> of 0.857μM on average against 42 human tumor cells (0.37μM on average of 12 cell lines)                                                                                                                                                                                      | <i>Streptomyces atratus</i>                  | (Ueberschaar et al., 2011)            |
| Hydrazidomycin B | IC <sub>50</sub> of 10.7μM on average against 42 human tumor cells (6.04 μM on average of 12 cell lines)                                                                                                                                                                                      | <i>Streptomyces atratus</i>                  | (Ueberschaar et al., 2011)            |
| Geralcin B       | IC <sub>50</sub> of 5μM against MDA231 breast cancer cells                                                                                                                                                                                                                                    | <i>Streptomyces</i> sp. LMA-545              | (Le Goff et al., 2012)                |
| Geralcin C       | IC <sub>50</sub> of 0.8μM against KB and HCT116 cancer cells, 0.7mM against <i>E. coli</i> DnaG primase                                                                                                                                                                                       | <i>Streptomyces</i> sp. LMA-545              | (Le Goff et al., 2013)                |
| Elainomycin      | 0.24-1.25μg/ml against <i>M. tuberculosis</i> , IC <sub>50</sub> of 16.3μM against HepG2 cancer cells                                                                                                                                                                                         | <i>Streptomyces hepaticus</i>                | (Ehrlich et al., 1954, Karlson, 1962) |
|                  | IC <sub>50</sub> of 12.26μM on average against 12 human tumor cells                                                                                                                                                                                                                           | <i>Streptomyces</i> sp. strain HKI0708       | (Ding et al., 2012)                   |
| Elainomycin B    | IC <sub>50</sub> of 100μM, 1.0μM, 6.5μM against <i>S. lentus</i> , acetylcholinesterase, phosphodiesterase                                                                                                                                                                                    | <i>Streptomyces</i> sp. BK 190               | (Helaly et al., 2011)                 |
| Elainomycin C    | IC <sub>50</sub> of 100μM, 2.0μM, 8μM against <i>S. lentus</i> , acetylcholinesterase, phosphodiesterase                                                                                                                                                                                      | <i>Streptomyces</i> sp. BK 190               | (Helaly et al., 2011)                 |
| Elainomycin H    | IC <sub>50</sub> of 4.86μM on average against 12 human tumor cells                                                                                                                                                                                                                            | <i>Streptomyces</i> sp. strain HKI0708       | (Ding et al., 2012)                   |
| Elainomycin K    | IC <sub>50</sub> of 30.05μM, 54.15μM, 47.5μM against <i>B. subtilis</i> , <i>S. lentus</i> , <i>X. camperstris</i>                                                                                                                                                                            | <i>Streptomyces</i> sp. Tü 6399              | (Manderscheid et al., 2013)           |
| Elainomycin L    | IC <sub>50</sub> of 22.9μM, 41.7μM, 51.3μM against <i>B. subtilis</i> , <i>S. lentus</i> , <i>X. camperstris</i>                                                                                                                                                                              | <i>Streptomyces</i> sp. Tü 6399              | (Manderscheid et al., 2013)           |
| LL-BH872α        | potent antifungal agent                                                                                                                                                                                                                                                                       | <i>Streptomyces hinnulinus</i>               | (McGahren and Kunstmann, 1969)        |
| Valanimycin      | MIC 0.078μg/ml, 1.25μg/ml, 1.25μg/ml against <i>E. coli</i> BE1121, <i>E. coli</i> K12, <i>E. coli</i> ML1629, IC <sub>50</sub> of 0.79μg/ml, 1.44μg/ml, 2.65μg/ml against L1210, P388/ADR, P388/S leukemia cells, and prolonged life span of mice inoculated with Ehrlich carcinoma or L1210 | <i>Streptomyces viridifaciens</i> MG456-hF10 | (Amato et al., 1986)                  |
| Jietacins A      | 0.25μg/ml exhibited 100% mortality <i>Bursaphelenchus lignicolus</i> , 11 mm and 7.5 mm zone of inhibition against <i>A. niger</i> and <i>M. racemosus</i> at concentration of 1.0mg/ml                                                                                                       | <i>Streptomyces</i> sp. KP-197               | (Omura et al., 1987)                  |
| Jietacins B      | 0.25μg/ml exhibited 100% mortality <i>Bursaphelenchus lignicolus</i>                                                                                                                                                                                                                          | <i>Streptomyces</i> sp. KP-197               | (Omura et al., 1987)                  |
| Lyophyllin       | tumor inhibiting                                                                                                                                                                                                                                                                              | <i>Lyophyllum connatum</i>                   | (Fugmann and Steglich, 1984)          |
| Maniwamycins A   | 8 mm zone of inhibition (50μg/disk) against <i>Rhodotorula</i> sp.                                                                                                                                                                                                                            | <i>Actinomadura</i> sp.                      | (Takahashi et al., 1989)              |

## REFERENCES

- Amato M., Iinuma H., Naganawa H., Yamagishi Y., Amada M., Masuda T., et al. (1986). Isolation and properties of valanimycin, a new azoxy antibiotic. *J. Antibiot.* 39, 184-91.
- Bauer J. D., King R. W., Brady S. F. (2010). Utahmycins A and B, azaquinones produced by an environmental DNA clone. *J. Nat. Prod.* 73, 976-9. doi: 10.1021/np900786s
- Ding L., Ndejoung, Basile Le Sage Tchize, Maier A., Fiebig H., Hertweck C. (2012). Elaiomycins D–F, antimicrobial and cytotoxic azoxides from *Streptomyces* sp. strain HKI0708. *J. Nat. Prod.* 75, 1729-34. doi: 10.1021/np300329m
- Ehrlich J., ANDERSON L. E., Coffey G., Feldman W., Fisher M., Hillegas A., et al. (1954). Elaiomycin, a New Tuberculostatic Antibiotic. *Biologic Studies. Antibiotics & Chemotherapy* 4, 338-42.
- El Sayed K. A., Youssef D. T., Marchetti D. (2006). Bioactive natural and semisynthetic latrunculins. *J. Nat. Prod.* 69, 219-23. doi: 10.1021/np050372r
- Fugmann B., and Steglich W. (1984). Unusual components of the toadstool *Lyophyllum connatum* (agaricales). *Angewandte Chemie International Edition* 23, 72-3.
- Funato N., Takayanagi H., Konda Y., Toda Y., Harigaya Y., Iwai Y., et al. (1994). Absolute configuration of staurosporine by X-ray analysis. *Tetrahedron Lett.* 35, 1251-4.
- Gómez C., Olano C., Palomino-Schätzlein M., Pineda-Lucena A., Carbajo R. J., Brana A. F., et al. (2012). Novel compounds produced by *Streptomyces lydicus* NRRL 2433 engineered mutants altered in the biosynthesis of streptolydigin. *J. Antibiot.* 65, 341-8. doi: 10.1038/ja.2012.37
- Helaly S. E., Pesic A., Fiedler H., Süssmuth R. D. (2011). Elaiomycins B and C: Alkylhydrazide antibiotics from *Streptomyces* sp. BK 190. *Org. Lett.* 13, 1052-5. doi: 10.1021/ol1031014
- Henkel T., Rohr J., Beale J. M., Sshwenen L. (1990). Landomycins, new angucycline antibiotics from *Streptomyces* sp. *J. Antibiot.* 43, 492-503.
- Kaneda M., Naid T., Kitahara T., Nakamura S., Hirata T., Suga T. (1988). Carbazomycins G and H, novel carbazomycin-congeners containing a quinol moiety. *J. Antibiot.* 41, 602-8.
- Karlson A. (1962). Specific inhibitory effect of elaiomycin in vitro upon *Mycobacterium tuberculosis*. *Antibiotics & Chemotherapy* 12, 446-9.
- Le Goff G., Martin M., Iorga B. I., Adelin E., Servy C., Cortial S., et al. (2013). Isolation and Characterization of Unusual Hydrazides from *Streptomyces* sp. Impact of the Cultivation Support and Extraction Procedure. *J. Nat. Prod.* 76, 142-9. doi: 10.1021/np300527p
- Le Goff G., Martin M., Servy C., Cortial S., Lopes P., Bialecki A., et al. (2012). Isolation and Characterization of  $\alpha$ ,  $\beta$ -Unsaturated  $\gamma$ -Lactono-Hydrazides from *Streptomyces* sp. *J. Nat. Prod.* 75, 915-9. doi: 10.1021/np300026p

- Lin W., Brauers G., Ebel R., Wray V., Berg A., Sudarsono, et al. (2003). Novel Chromone Derivatives from the Fungus *Aspergillus versicolor* Isolated from the Marine Sponge *Xestospongia exigua*. *J. Nat. Prod.* 66, 57-61. doi: 10.1021/np020196b
- Manderscheid N., Helaly S. E., Kulik A., Wiese J., Imhoff J. F., Fiedler H., et al. (2013). Elaiomycins K and L, new azoxy antibiotics from *Streptomyces* sp. Tü 6399. *J. Antibiot.* 66, 85-8. doi: 10.1038/ja.2012.99
- McGahren W. J., and Kunstmann M. (1969). Novel. alpha., beta.-unsaturated azoxy-containing antibiotic. *J. Am. Chem. Soc.* 91, 2808-10.
- Omura S., Otaguro K., Imamura N., Kuga H., Takahashi Y., Masuma R., et al. (1987). Jietacins A and B, new nematocidal antibiotics from a *Streptomyces* sp. *J. Antibiot.* 40, 623-9.
- Richardson W. H., Schmidt T. M., Neelson K. H. (1988). Identification of an anthraquinone pigment and a hydroxystilbene antibiotic from *Xenorhabdus luminescens*. *Appl. Environ. Microbiol.* 54, 1602-5.
- Takahashi Y., Nakayama M., Watanabe I., Deushi T., Ishiata H., Shiratsuchi M., et al. (1989). Novel Antifungal Antibiotics Maniwamycins A and B. *J. Antibiot.* 42, 1541-6.
- Ueberschaar N., Ndejoung, Ble S., Ding L., Maier A., Fiebig H., Hertweck C. (2011). Hydrazidomycins, cytotoxic alkylhydrazides from *Streptomyces* sp. *Bioorg. Med. Chem. Lett.* 21, 5839-41. doi: 10.1016/j.bmcl.2011.07.108
- Van Boom J., Burgers P., Haasnoot C., Reese C. (1977). Recueil des Travaux Chimiques des Pays-Bas Journal of the Royal Netherlands Chemical Society: General method for the synthesis of 3', 5'-diesters and 2'-acetals of the four common nucleosides. *Recueil des Travaux Chimiques des Pays-Bas* 96, 91-5.
- 牛山敬一, 田中信寿, 小野博史, 尾形晴見. (1971). 新抗生物質 Juglomycins の研究 第 1 報. *Jpn J. Antibiot.* 24, 197-9.
